# Supplementary material
Source: ML conference proceedings conference paper supplement (https://openreview.net/forum?id=--fdtqo-iKM)
Supplement: supplementary_material [file attachment]

## Checklist

1. For all authors...
  - (a) Do the main claims made in the abstract and introduction accurately reflect the paper's contributions and scope? [Yes] The abstract and the introduction do provide a concise statement of the original result proved in this paper.
  - (b) Did you describe the limitations of your work? [Yes] The limitations of our work are explicit as we described in 3 the subclass of MDPs on which the theorem applies.
  - (c) Did you discuss any potential negative societal impacts of your work? [No] This work is mainly of mathematical nature and we hope that it has a very little direct societal impact.
  - (d) Have you read the ethics review guidelines and ensured that your paper conforms to them? [Yes] We confirm that our paper complies with the ethical guidelines of Neurips.
2. If you are including theoretical results...
  - (a) Did you state the full set of assumptions of all theoretical results? [Yes] All assumptions and the context of the theorem are provided in 2 and 3.
  - (b) Did you include complete proofs of all theoretical results? [Yes] A sketch of the proof is given in 4.3 and the complete proof is given in the supplemental material.
3. If you ran experiments...
  - (a) Did you include the code, data, and instructions needed to reproduce the main experimental results (either in the supplemental material or as a URL)? [N/A] There is no experiment in this paper.
  - (b) Did you specify all the training details (e.g., data splits, hyperparameters, how they were chosen)? [N/A] There is no experiment in this paper.
  - (c) Did you report error bars (e.g., with respect to the random seed after running experiments multiple times)? [N/A] There is no experiment in this paper.
  - (d) Did you include the total amount of compute and the type of resources used (e.g., type of GPUs, internal cluster, or cloud provider)? [N/A] There is no experiment in this paper.
4. If you are using existing assets (e.g., code, data, models) or curating/releasing new assets...
  - (a) If your work uses existing assets, did you cite the creators? [N/A] We did not work with existing assets or new assets.
  - (b) Did you mention the license of the assets? [N/A] We did not work with existing assets or new assets.
  - (c) Did you include any new assets either in the supplemental material or as a URL? [N/A] We did not work with existing assets or new assets.
  - (d) Did you discuss whether and how consent was obtained from people whose data you're using/curating? [N/A] We did not work with existing assets or new assets.
  - (e) Did you discuss whether the data you are using/curating contains personally identifiable information or offensive content? [N/A] We did not work with existing assets or new assets.
5. If you used crowdsourcing or conducted research with human subjects...
  - (a) Did you include the full text of instructions given to participants and screenshots, if applicable? [N/A] We did not work with human subjects.
  - (b) Did you describe any potential participant risks, with links to Institutional Review Board (IRB) approvals, if applicable? [N/A] We did not work with human subjects.
  - (c) Did you include the estimated hourly wage paid to participants and the total amount spent on participant compensation? [N/A] We did not work with human subjects.
